# Supplementary material for: Nivolumab serum concentration in metastatic melanoma patients could be related to outcome and enhanced immune activity: a gene profiling retrospective analysis
Source: HighWire-hosted journal article supplement (doi:10.1136/jitc-2022-005132), 2022-11-01

**Supplementary data****Supplementary Table 1. Univariate and multivariate analysis on PFS**

|                                                        | Univariate<br>HR (95% C.I.) | Multivariate<br>HR (95% C.I.)                              |
|--------------------------------------------------------|-----------------------------|------------------------------------------------------------|
| GENDER (M vs F)                                        | 1.01 (0.61-1.69) p=0.96     | 0.81 (0.45-1.47) p=0.49                                    |
| AGE (>=64 vs <64)                                      | 1.39 (0.83-2.32) p=0.21     | 1.72 (0.89-3.34) p=0.11                                    |
| BRAF (mutated vs wild-type)                            | 1.31 (0.75-2.28) p=0.35     | 1.28 (0.66-2.51) p=0.46                                    |
| BRAIN metastasis<br>(yes vs no)                        | 1.70 (0.99-2.92) p=0.057    | 1.67 (0.81-3.46) p=0.16                                    |
| Metastasis at nivolumab start<br>(lung vs soft tissue) | 0.72 (0.31-1.71) p=0.46     | 0.74 (0.29-1.90) p=0.53                                    |
| (visceral vs soft tissue)                              | 1.14 (0.63-2.09) p=0.66     | 1.16 (0.50-2.68) p=0.74                                    |
| LINE OF THERAPY<br>(first-line vs not first-line)      | 0.67 (0.40-1.11) p=0.12     | 0.58 (0.32-1.05) p=0.074                                   |
| LDH<br>(elevated vs normal)                            | 1.14 (0.64-2.04) p=0.65     | Not considered because of too many missing value           |
| Nivolumab regimen<br>(240 mg vs 3 mg/kg)               | 1.08 (0.51-2.32) p=0.84     | 0.73 (0.31-1.74) p=0.48                                    |
| (480 mg vs 3 mg/kg)                                    | 0.90 (0.47-1.71) p=0.74     | 0.87 (0.41-1.86) p=0.73                                    |
| Nivolumab concentration<br>(>=32 vs <32)               | 0.61 (0.36-1.01) P=0.058    | 0.54 (0.30-0.98) p=0.043                                   |
| Nivolumab concentration                                | 0.97 (0.95-0.99) p=0.01     | Not considered because dichotomized concentration was used |

CI: confidence interval; HR: hazard ratio; LDH: lactate dehydrogenase.

**Supplementary Table 2. Univariate and multivariate analysis on OS**

|                                 | Univariate<br>HR (95% C.I.) | Multivariate<br>HR (95% C.I.) |
|---------------------------------|-----------------------------|-------------------------------|
| GENDER (M vs F)                 | 0.87 (0.50-1.51) p=0.62     | 0.64 (0.34-1.21) p=0.17       |
| AGE (>=64 vs <64)               | 1.47 (0.84-2.58) p=0.18     | 1.59 (0.78-3.24) p=0.20       |
| BRAF (mutated vs wild-type)     | 1.08 (0.58-2.00) p=0.80     | 0.96 (0.46-1.99) p=0.91       |
| BRAIN metastasis<br>(yes vs no) | 1.71 (0.95-3.09) p=0.07     | 1.50 (0.69-3.25) p=0.30       |

|                                                        |                          |                                                            |
|--------------------------------------------------------|--------------------------|------------------------------------------------------------|
| Metastasis at nivolumab start<br>(lung vs soft tissue) | 0.67 (0.25-1.79) p=0.42  | 0.65 (0.22-1.95) p=0.44                                    |
| (visceral vs soft tissue)                              | 1.21 (0.62-2.34) p=0.58  | 1.37 (0.54-3.49) p=0.51                                    |
| LINE OF THERAPY<br>(first-line vs not first-line)      | 0.67 (0.39-1.18) p=0.16  | 0.52 (0.27-1.00) p=0.051                                   |
| LDH<br>(elevated vs normal)                            | 1.31 (0.70-2.46) p=0.40  | Not considered because of too many missing value           |
| Nivolumab regimen<br>(240 mg vs 3 mg/kg)               | 1.33 (0.61-2.88) p=0.47  | 1.05 (0.43-2.57) p=0.91                                    |
| (480 mg vs 3 mg/kg)                                    | 0.77 (0.37-1.61) p=0.49  | 0.79 (0.34-1.83) p=0.59                                    |
| Nivolumab concentration<br>( $\geq 32$ vs $< 32$ )     | 0.54 (0.31-0.95) P=0.03  | 0.42 (0.22-0.82) p=0.01                                    |
| Nivolumab concentration                                | 0.97 (0.94-0.99) p=0.007 | Not considered because dichotomized concentration was used |

CI: confidence interval; HR: hazard ratio; LDH: lactate dehydrogenase.

**Supplementary Table 3. Renal and hepatic function in patients with higher and lower concentrations of nivolumab.**

| Patient with higher concentration of nivolumab | Average (range)    | Normal Range     |
|------------------------------------------------|--------------------|------------------|
| Creatinine                                     | 0.84 (0.4-2)       | 0.51- 0.95 mg/dl |
| eGFR                                           |                    |                  |
| female                                         | 99.9 (14.8-209)    | > 85 mL/min      |
| male                                           | 115.8 (56.4-190.5) | > 90 mL/min      |
| Albumin                                        | 4.1 (3.4-4.7)      | 3.5-5.3 g/dl     |
| ALT                                            | 24 (6-119)         | 4-32 U/L         |
| AST                                            | 18.78 (9-53)       | 4-32 U/L         |
| GGT                                            | 42.2 (7-243)       | < 40 U/L         |
|                                                |                    |                  |
| Patients with lower concentration of nivolumab |                    |                  |
| Creatinine                                     | 0.87 (0.4-1.6)     | 0.51- 0.95 mg/dl |

|         |                     |              |
|---------|---------------------|--------------|
| eGFR    |                     |              |
| female  | 100,4 (25.4-209.12) | > 85 mL/min  |
| male    | 110.9 (56.41-190.5) | > 90 mL/min  |
| Albumin | 3.8 (3.4-4.5)       | 3.5-5.3 g/dl |
| ALT     | 20.7 (7-51)         | 4-32 U/L     |
| AST     | 18.7 (9-29)         | 4-32 U/L     |
| GGT     | 43.1 (8-198)        | < 40 U/L     |

ALT: alanine aminotransferase; AST: aspartate transaminase; GGT: gamma-glutamyl transferase;  
eGFR: estimated glomerular filtration rate

**Supplementary Figure 1. Relationship between nivolumab serum concentration and patients' response.**

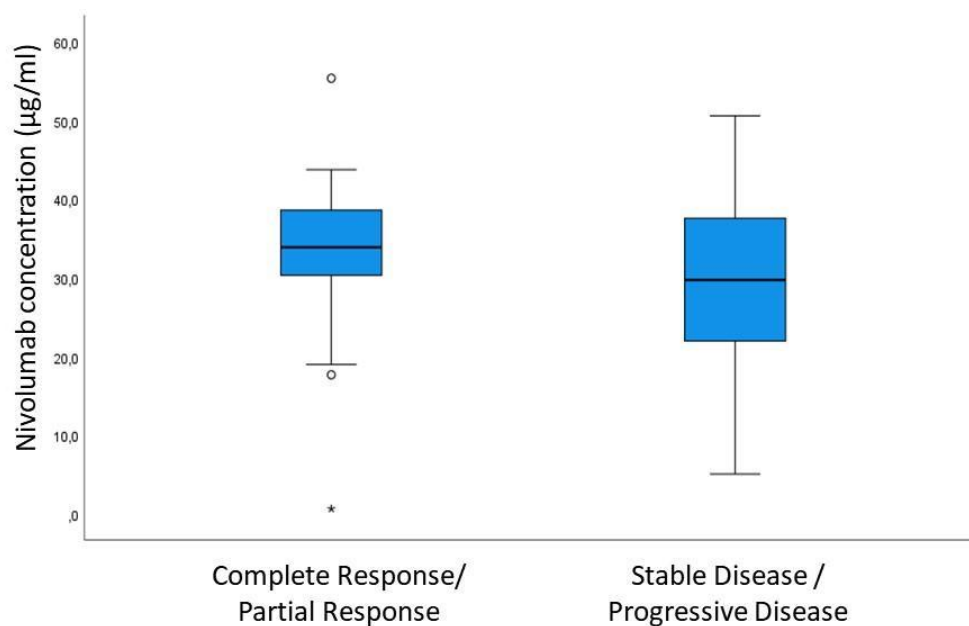

Supplement: jitc-2022-005132supp001_data_supplement.pdf [file jitc-2022-005132supp001_data_supplement.pdf]
